# Supplementary material for: Evaluating a National Biomedical Training Program Using QuantCrit: Revealing Disparities in Research Self-efficacy for Women of Color Undergraduates
Source: Atypon-hosted journal article supplement (doi:10.1187/cbe.24-02-0047), 2024-10-09

# Supplemental Material

*CBE—Life Sciences Education*

Srinivasan *et al.*

## Appendix

**Table A1**

*Balance Table for the Treatment (BUILD students) and Control (non-BUILD students) Groups Before and After Weighting*

|                                 | Before Weighting |              |                | After Weighting |              |                |
|---------------------------------|------------------|--------------|----------------|-----------------|--------------|----------------|
|                                 | Mean Treatment   | Mean Control | Std.Mean Diff. | Mean Treatment  | Mean Control | Std.Mean Diff. |
| distance                        | 0.34             | 0.12         | 1.09           | 0.16            | 0.16         | 0.00           |
| Man                             | 0.23             | 0.33         | -0.22          | 0.32            | 0.31         | 0.02           |
| Non-Binary                      | 0.01             | 0.01         | 0.02           | 0.01            | 0.01         | -0.01          |
| Woman                           | 0.76             | 0.66         | 0.22           | 0.67            | 0.67         | -0.01          |
| Latine                          | 0.21             | 0.29         | -0.19          | 0.33            | 0.28         | 0.13           |
| Black/AA                        | 0.48             | 0.16         | 0.73           | 0.22            | 0.21         | 0.03           |
| Asian American                  | 0.18             | 0.25         | -0.17          | 0.23            | 0.23         | -0.01          |
| Pell awardees                   | 0.44             | 0.43         | 0.03           | 0.44            | 0.44         | 0.00           |
| White                           | 0.28             | 0.41         | -0.26          | 0.41            | 0.39         | 0.04           |
| AIAN                            | 0.04             | 0.02         | 0.07           | 0.05            | 0.03         | 0.10           |
| NHPI                            | 0.01             | 0.01         | -0.07          | 0.02            | 0.01         | 0.10           |
| HS GPA A                        | 0.40             | 0.29         | 0.22           | 0.32            | 0.31         | 0.03           |
| HS GPA A-                       | 0.27             | 0.30         | -0.06          | 0.34            | 0.29         | 0.10           |
| HS GPA B                        | 0.10             | 0.14         | -0.13          | 0.09            | 0.14         | -0.13          |
| HS GPA B-                       | 0.03             | 0.03         | -0.02          | 0.04            | 0.04         | 0.03           |
| HS GPA B+                       | 0.19             | 0.22         | -0.07          | 0.18            | 0.21         | -0.08          |
| HS GPA C                        | 0.01             | 0.01         | 0.00           | 0.00            | 0.01         | -0.04          |
| HS GPA C+                       | 0.01             | 0.01         | -0.04          | 0.02            | 0.01         | 0.12           |
| HS GPA D                        | 0.00             | 0.00         | -0.04          | 0.00            | 0.00         | -0.04          |
| Black/AA Women                  | 0.39             | 0.11         | 0.67           | 0.16            | 0.16         | 0.01           |
| Latine Women                    | 0.17             | 0.20         | -0.09          | 0.21            | 0.20         | 0.03           |
| Asian American Women            | 0.13             | 0.15         | -0.08          | 0.15            | 0.15         | 0.01           |
| White Women                     | 0.19             | 0.26         | -0.17          | 0.26            | 0.26         | 0.01           |
| AIAN Women                      | 0.03             | 0.02         | 0.07           | 0.03            | 0.02         | 0.04           |
| NHPI Women                      | 0.00             | 0.01         | -0.06          | 0.01            | 0.01         | 0.03           |
| RSE at Baseline                 | 53.98            | 52.34        | 0.17           | 52.91           | 52.69        | 0.02           |
| First Generation student Status | 0.18             | 0.26         | -0.19          | 0.24            | 0.25         | -0.03          |
| 2016 Cohort                     | 0.28             | 0.24         | 0.11           | 0.41            | 0.26         | 0.34           |
| 2017 Cohort                     | 0.28             | 0.27         | 0.00           | 0.32            | 0.27         | 0.13           |
| 2018 Cohort                     | 0.21             | 0.27         | -0.14          | 0.16            | 0.25         | -0.21          |
| 2019 Cohort                     | 0.24             | 0.22         | 0.03           | 0.11            | 0.22         | -0.28          |
| Site1                           | 0.09             | 0.21         | -0.33          | 0.20            | 0.19         | 0.01           |
| Site2                           | 0.01             | 0.08         | -0.33          | 0.07            | 0.07         | -0.01          |
| Site3                           | 0.06             | 0.03         | 0.12           | 0.04            | 0.04         | 0.01           |
| Site4                           | 0.07             | 0.08         | -0.05          | 0.08            | 0.08         | 0.02           |
| Site5                           | 0.01             | 0.09         | -0.40          | 0.09            | 0.08         | 0.03           |
| Site6                           | 0.02             | 0.04         | -0.12          | 0.04            | 0.04         | 0.03           |
| Site7                           | 0.05             | 0.06         | -0.04          | 0.08            | 0.06         | 0.08           |
| Site8                           | 0.19             | 0.22         | -0.09          | 0.19            | 0.21         | -0.04          |
| Site9                           | 0.13             | 0.08         | 0.16           | 0.08            | 0.09         | -0.03          |
| Site10                          | 0.03             | 0.07         | -0.19          | 0.06            | 0.07         | -0.04          |
| Site11                          | 0.35             | 0.03         | 0.88           | 0.08            | 0.08         | 0.00           |

*Note.* Abbreviations: AIAN = American Indian and/or Alaska Native. NHPI = Native Hawaiian and Pacific Islander.

**Figure A1**

*Density Plots to Examine the Balance of Select Few Covariates. Imbalances are Represented by the Differences between the Black (Treated) and Gray (Control) Lines*

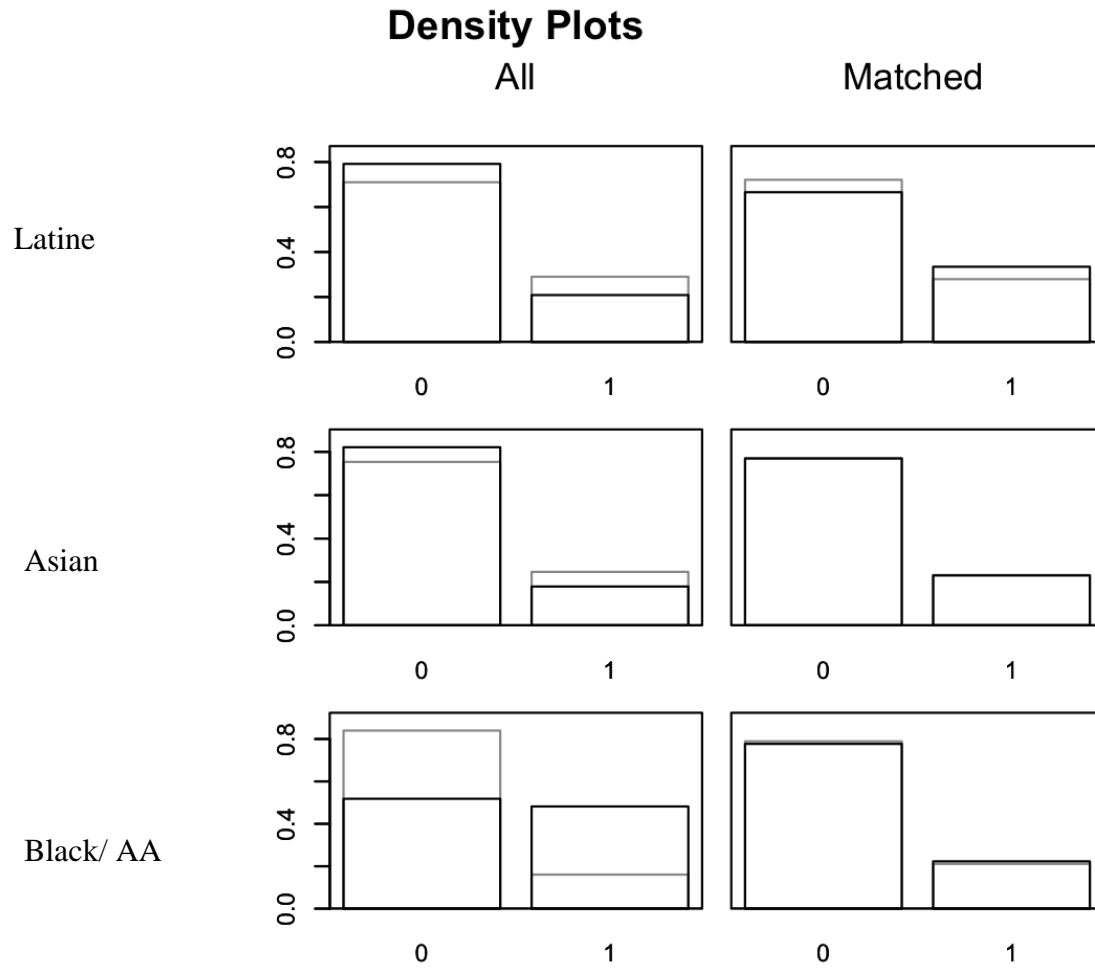

Supplement: combinedsupmats.pdf [file combinedsupmats.pdf]
